# Supplementary material for: Metabolomic Prediction of Human Prostate Cancer Aggressiveness: Magnetic Resonance Spectroscopy of Histologically Benign Tissue
Source: PubMed Central journal article supplement (PMC5980000; doi:10.1038/s41598-018-23177-w), 2018-03-26
Supplement: 41598_2018_23177_MOESM1_ESM.pdf [file 41598_2018_23177_MOESM1_ESM.pdf]

**Metabolomic Prediction of Human Prostate Cancer Aggressiveness: Magnetic Resonance Spectroscopy of Histologically Benign Tissue**

Lindsey A. Vandergrift<sup>1</sup>, Emily A. Decelle<sup>1</sup>, Johannes Kurth<sup>1,4</sup>, Shulin Wu<sup>1</sup>, Taylor L. Fuss<sup>1</sup>,

Elita M. DeFeo<sup>1</sup>, Elkan F. Halpern<sup>2</sup>, Matthias Taupitz<sup>4</sup>,

W. Scott McDougal<sup>1,3</sup>, Aria F. Olumi<sup>1,3</sup>, Chin-Lee Wu<sup>1\*</sup>, and Leo L. Cheng<sup>1,2\*</sup>

<sup>1</sup>Department of Pathology, Massachusetts General Hospital, Harvard Medical School,  
Boston, Massachusetts, 02114 USA

<sup>2</sup>Department of Radiology, Massachusetts General Hospital, Harvard Medical School,  
Boston, Massachusetts, 02114 USA

<sup>3</sup>Department of Urology, Massachusetts General Hospital, Harvard Medical School,  
Boston, Massachusetts, 02114 USA

<sup>4</sup>Department of Radiology, Charité Medical University of Berlin, Charitéplatz 1,  
10117 Berlin, Germany

## Supplementary Information

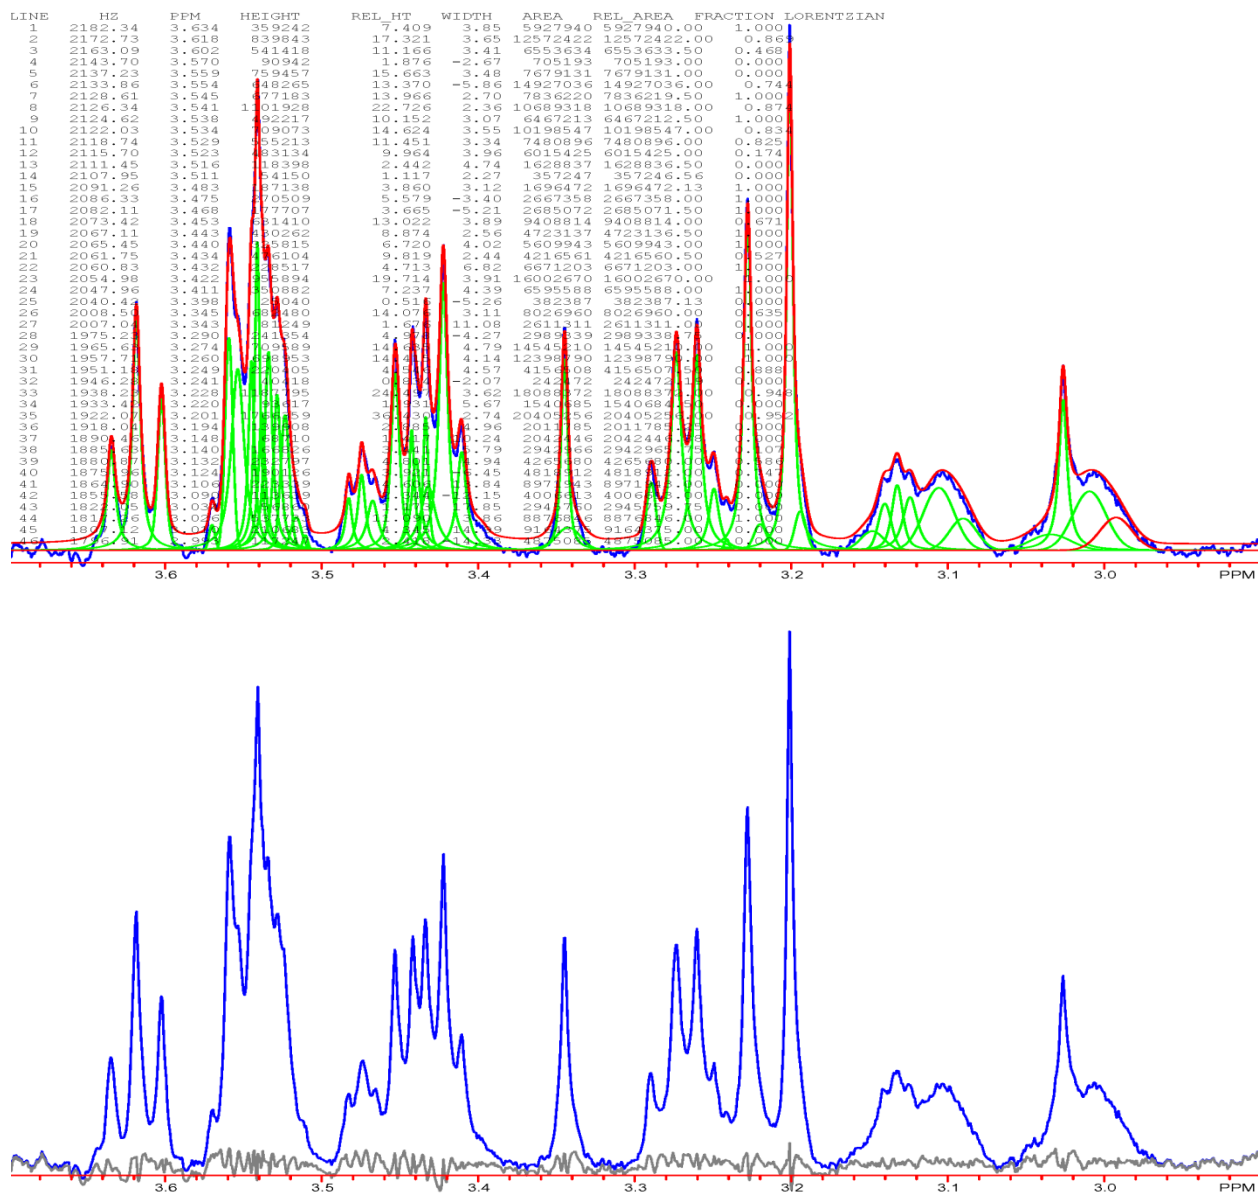

**Fig S1. An example of a curve fitted spectral region.** The top panel presents the results of Lorentzian-Gaussian curve fitting achieved in the spectral region (2.9-3.7 ppm). Green curves represent individual fitted peaks (with fitting parameters listed in the figure), while the red curve (except the far right individual red peak at 2.90 ppm) represents the sum of individual curves that overlay with blue experimental curves. The bottom panel presents the experimental curve in blue and differences between the experimental and fitted curves in grey.

**Table S1. Linear correlations (*r* values) of spectral region relative intensities with volume percentages of prostate cancer pathologies quantified from tissues after MRS, and Student t-test on prostate cancer (PCa) (n=27) and Hb (n=338) groups. (\* possible major contributing metabolites were listed according to chemical shift values seen in literature; \*\* indicate p<0.05 after Bonferroni corrections).**

| Res.      | Major Metabol*.            | HB Epi (Vol%) | Prostate cancer (Vol%) | Stroma (Vol%) | Prostate cancer vs. Hb |
|-----------|----------------------------|---------------|------------------------|---------------|------------------------|
| p414-410  | <i>Lac</i>                 | ** , -0.168   | ** , +0.168            |               | ** , PCa>Hb            |
| p405      | <i>m-Ino</i>               | ** , 0.182    |                        |               |                        |
| P399-396  | <i>His, Phe, PC, Ser</i>   |               |                        |               |                        |
| p394-393  | <i>Cr, PCr, GPC, Ser</i>   | ** , -0.181   |                        | ** , 0.175    |                        |
| P378      | <i>Ala, Glu, Gln, GSH</i>  |               |                        |               |                        |
| P375      | <i>Ala, Glu, Gln</i>       |               | ** , 0.174             |               |                        |
| P374-371  | <i>Ala, Glu, Gln</i>       | ** , -0.328   |                        | ** , 0.204    |                        |
| p363      | <i>m-Ino, GPC, PC</i>      |               |                        |               |                        |
| p362      | <i>m-Ino, GPC, PC</i>      | ** , 0.194    |                        |               |                        |
| p36       | <i>m-Ino, GPC, PC, Val</i> |               |                        |               |                        |
| p334      | <i>s-Ino</i>               |               |                        |               |                        |
| p329      | <i>m-Ino, Tau</i>          |               |                        |               | ** , PCa<Hb            |
| p327      | <i>m-Ino, Tau, Phe</i>     |               | ** , -0.171            |               | ** , PCa<Hb            |
| p326      | <i>m-Ino, Tau</i>          | ** , -0.175   |                        | ** , 0.245    | ** , PCa<Hb            |
| p324      | <i>m-Ino, Tau</i>          | ** , -0.176   |                        | ** , 0.250    | ** , PCa<Hb            |
| p322      | <i>PC, GPC, His</i>        |               | ** , 0.178             |               | ** , PCa>Hb            |
| p320      | <i>Cho</i>                 | ** , -0.211   |                        |               |                        |
| p315-310  | <i>Spm, His, Phe</i>       | ** , 0.428    |                        | ** , -0.363   |                        |
| p309-305  | <i>Spm</i>                 | ** , 0.273    |                        | ** , -0.235   |                        |
| p303      | <i>Cr, PCr</i>             |               |                        |               |                        |
| p271      | <i>Cit</i>                 | ** , 0.487    |                        | ** , -0.435   |                        |
| p268      | <i>Cit</i>                 | ** , 0.368    |                        | ** , -0.354   |                        |
| p255      | <i>Cit, GSH</i>            | ** , 0.391    |                        | ** , -0.333   |                        |
| p252      | <i>Cit, GSH</i>            | ** , 0.299    |                        | ** , -0.256   |                        |
| P245-p243 | <i>Gln</i>                 | ** , -0.174   |                        | ** , 0.171    |                        |
| P242-p240 | <i>Gln</i>                 |               |                        |               |                        |
| P236      | <i>Glu, Pyruvate</i>       |               |                        |               |                        |
| P235      | <i>Glu</i>                 |               | ** , 0.216             |               | ** , PCa>Hb            |
| P234      | <i>Glu</i>                 |               |                        |               |                        |
| P233-p230 | <i>Glu</i>                 |               |                        |               |                        |
| p147      | <i>Ala</i>                 |               |                        |               |                        |
| p133      | <i>Lac, (Lip)</i>          | ** , -0.214   |                        | ** , 0.204    |                        |
| p128      | <i>Lip</i>                 |               |                        |               |                        |
| P120      |                            |               |                        |               |                        |
| p096-p093 | <i>Val, Lip</i>            | ** , -0.262   |                        | ** , 0.218    |                        |
| p090      | <i>Lip</i>                 | ** , -0.175   |                        |               |                        |

Abbreviations: Res, resonance region; Lac, lactate; m-Ino, myo-inositol; Cr, creatine; PCr, phosphocreatine; GPC, glycerophosphocholine; Ala, alanine; Glu, glutamate; Gln, glutamine; GSH, glutathione; His, histidine; Phe, Phenylalanine; PC, phosphocholine; Val, valine; s-Ino, scyllo-inositol; Tau, taurine; Cho, choline; Ser, serine; Spm, spermine; Cit, citrate; Lip, lipids.

“p414-410” indicates spectral region 4.14-4.10 ppm, “PCa>Hb, or PCa<Hb” indicating the mean values of the relative intensity of the specific spectral region measured for prostate cancer group are greater, or smaller, than that measured for the Hb group.

**Table S2. Evaluations of prostate cancer metabolites and metabolomic profiles reported against patient age at surgery, pre-surgical serum PSA and BPH status in terms of prostate size by general linear model of co-variance analysis.** Results below indicate the preservation of the statistical significances of the reported prostate cancer metabolites and metabolomic profiles in differentiating prostate cancer aggressiveness parameters after consideration of these clinical factors as co-variances. (e.g. The 3.60 ppm resonance in Figure 2B differentiates among all groups in the training and testing cohorts, including BPH and Bx groups, after inclusion of “age” as a co-variant, and the resulting differentiating significance is  $p < 0.0001$  shown in the “Groups Prob>F” column.) Table S2 should only be used in conjunction with the results presented in Figures 2, 3, and 4 to indicate the statistical significances presented in those figures are free from the interference of the three clinical factors examined.

| <b>Co-variances Tested</b>                                                             | <b>Number of Parameters</b> | <b>Degrees of Freedom</b> | <b>Sum of Squares</b> | <b>F Ratio</b> | <b>Groups Prob &gt; F</b> |
|----------------------------------------------------------------------------------------|-----------------------------|---------------------------|-----------------------|----------------|---------------------------|
| <i>Figure 2B. 3.60ppm Between testing cohort Hb PGG=1&amp;2 and PGG=3&amp;4 Groups</i> |                             |                           |                       |                |                           |
| <b>Age</b>                                                                             | 1                           | 1                         | 0.9527                | 4.5414         | <b>0.0347</b>             |
| <b>Pre-Surg PSA</b>                                                                    | 1                           | 1                         | 1.0158                | 4.9922         | <b>0.0269</b>             |
| <b>Wt(gm)</b>                                                                          | 1                           | 1                         | 0.9663                | 4.6095         | <b>0.0333</b>             |
| <i>Figure 3B. PC4 Groups in Testing Cohort including BPH and Bx</i>                    |                             |                           |                       |                |                           |
| <b>Age</b>                                                                             | 4                           | 4                         | 236.5749              | 43.8779        | <b>&lt;0.0001</b>         |
| <b>Pre- Surg PSA</b>                                                                   | 4                           | 4                         | 279.2127              | 51.6032        | <b>&lt;0.0001</b>         |
| <b>Wt(gm)</b>                                                                          | 4                           | 4                         | 101.227               | 19.3569        | <b>&lt;0.0001</b>         |
| <i>Figure 4A. Canonical Score Between testing cohort BCR and non-BCR match groups</i>  |                             |                           |                       |                |                           |
| <b>Age</b>                                                                             | 1                           | 1                         | 5.66432               | 6.5986         | <b>0.0199</b>             |
| <b>Pre- Surg PSA</b>                                                                   | 1                           | 1                         | 5.214275              | 6.2249         | <b>0.0232</b>             |
| <b>Wt(gm)</b>                                                                          | 1                           | 1                         | 5.368418              | 6.4232         | <b>0.0214</b>             |

**Table S3. The coefficients for each spectral region in calculating PC4 in Figure 3.**

| <b>Spectral Regions</b> | <b>Coefficient</b> |
|-------------------------|--------------------|
| p414-410                | <b>-0.453</b>      |
| p405                    | -0.108             |
| p399-396                | 0.107              |
| p394-393                | 0.205              |
| P378                    | 0.097              |
| P375                    | 0.202              |
| P374-371                | 0.077              |
| p363                    | <b>0.236</b>       |
| p362                    | <b>0.278</b>       |
| p36                     | <b>0.305</b>       |
| p334                    | 0.144              |
| p329                    | -0.004             |
| p327                    | -0.039             |
| p326                    | 0.006              |
| p324                    | 0.128              |
| p322                    | 0.026              |
| p320                    | <b>-0.163</b>      |
| p315-310                | -0.008             |
| p309-305                | 0.071              |
| p303                    | 0.076              |
| p271                    | -0.106             |
| p268                    | -0.096             |
| p255                    | <b>-0.131</b>      |
| p252                    | -0.004             |
| P245-p243               | 0.032              |
| P242-p240               | 0.137              |
| P236                    | <b>-0.136</b>      |
| P235                    | 0.088              |
| P234                    | <b>0.273</b>       |
| P233-p230               | 0.126              |
| p147                    | -0.019             |
| p133                    | <b>-0.351</b>      |
| p128                    | 0.109              |
| p120                    | 0.116              |
| p096-p093               | 0.185              |
| p090                    | 0.11612            |

**Bold** numbers: major contributing factors defined as greater or smaller than Mean+StandardDeviation, or Mean-StandardDeviation, respectively.

**Table S4. Patient clinical and pathological Data for matched recurrent and non-recurrent cases.**

|                 |    | Cases | Status  | Epi%  | GS | GG1 | pT  | Pre-Op PSA | Dpsa  | Age | DOS     | Dof/u   |
|-----------------|----|-------|---------|-------|----|-----|-----|------------|-------|-----|---------|---------|
| Training Cohort | 1  | 154   | BCR     | 8.01  | 7  | 3   | 2ab | 3.1        | 0.065 | 62  | 1/2002  | 4/2003  |
|                 |    | 306   | non-BCR | 15.59 | 7  | 3   | 2ab | 5.3        | 0.126 | 65  | 6/2002  | 6/2011  |
|                 | 2  | 175   | BCR     | 33.19 | 7  | 4   | 2ab | 5.5        | 0.138 | 57  | 1/2002  | 1/2004  |
|                 |    | 289   | non-BCR | 30.00 | 6  | 3   | 2ab | 4.4        | 0.066 | 60  | 5/2002  | 2/2009  |
|                 | 3  | 252   | BCR     | 32.28 | 7  | 3   | 2ab | 6.3        | 0.183 | 57  | 4/2002  | 9/2005  |
|                 |    | 302   | non-BCR | 22.27 | 7  | 3   | 2ab | 3.2        | 0.111 | 59  | 6/2002  | 6/2014  |
|                 | 4  | 253   | BCR     | 10.17 | 6  | 3   | 2ab | 16.3       | 0.458 | 67  | 4/2002  | 9/2006  |
|                 |    | 258   | non-BCR | 7.91  | 6  | 3   | 2ab | 3.9        | 0.095 | 59  | 5/2002  | 10/2014 |
|                 | 5  | 260   | BCR     | 20.25 | 7  | 3   | 2ab | 5.4        | 0.152 | 61  | 5/2002  | 6/2010  |
|                 |    | 282   | non-BCR | 20.80 | 6  | 3   | 2ab | 3.3        | 0.040 | 64  | 5/2002  | 5/2014  |
|                 | 6  | 265   | BCR     | 18.79 | 6  | 3   | 2ab | 3.9        | 0.066 | 62  | 5/2002  | 2/2003  |
|                 |    | 329   | non-BCR | 12.21 | 6  | 3   | 2ab | 1.6        | 0.041 | 57  | 7/2002  | 1/2010  |
|                 | 7  | 268   | BCR     | 14.67 | 7  | 3   | 2ab | 7.1        | 0.310 | 51  | 5/2002  | 6/2008  |
|                 |    | 292   | non-BCR | 13.45 | 6  | 3   | 2ab | 0.6        | 0.010 | 64  | 5/2002  | 4/2014  |
|                 | 8  | 271   | BCR     | 19.11 | 6  | 3   | 2ab | 4.0        | 0.105 | 41  | 5/2002  | 4/2007  |
|                 |    | 285   | non-BCR | 12.70 | 6  |     | 2ab | 3.5        | 0.055 | 65  | 5/2002  | 5/2011  |
|                 | 9  | 286   | BCR     | 7.97  | 7  | 3   | 2ab | 2.7        | 0.077 | 58  | 5/2002  | 5/2010  |
|                 |    | 291   | non-BCR | 11.03 | 6  | 3   | 2ab | 4.5        | 0.032 | 59  | 5/2002  | 11/2013 |
|                 | 10 | 275   | BCR     | 9.5   | 7  | 4   | 2c  | 4.9        | 0.119 | 50  | 5/2002  | 2/2009  |
|                 |    | 161   | non-BCR | 10.0  | 7  | 3   | 2c  | 6.2        | 0.203 | 54  | 1/2002  | 4/2015  |
| Testing Cohort  | 1  | 203   | BCR     | 29.65 | 6  | 3   | 2ab | 5.5        | 0.106 | 59  | 2/2002  | 10/2008 |
|                 |    | 202   | non-BCR | 27.82 | 6  | 3   | 2ab | 11.0       | 0.196 | 55  | 2/2002  | 8/2014  |
|                 | 2  | 209   | BCR     | 1.23  | 7  | 4   | 2ab | 5.3        | 0.183 | 50  | 3/2002  | 1/2003  |
|                 |    | 247   | non-BCR | 22.17 | 7  | 4   | 2ab | 11.0       | 0.373 | 54  | 4/2002  | 4/2012  |
|                 | 3  | 213   | BCR     | 48.75 | 7  | 3   | 2ab | 13.0       | 0.260 | 51  | 3/2002  | 10/2003 |
|                 |    | 246   | non-BCR | 39.61 | 7  | 3   | 2ab | 1.3        | 0.051 | 62  | 4/2002  | 5/2014  |
|                 | 4  | 215   | BCR     | 24.98 | 6  | 3   | 2ab | 12.0       | 0.343 | 49  | 3/2002  | 4/2008  |
|                 |    | 615   | non-BCR | 25.05 | 6  | 3   | 2ab | 5.6        | 0.112 | 62  | 7/2003  | 5/2011  |
|                 | 5  | 235   | BCR     | 42.23 | 7  | 3   | 2ab | 6.3        | 0.187 | 57  | 4/2002  | 10/2007 |
|                 |    | 434   | non-BCR | 52.12 | 6  | 3   | 2ab | 8.2        | 0.200 | 59  | 11/2002 | 6/2014  |
|                 | 6  | 313   | BCR     | 38.98 | 7  | 3   | 2ab | 4.8        | 0.119 | 64  | 6/2002  | 2/2009  |
|                 |    | 331   | non-BCR | 39.62 | 6  | 3   | 2ab | 4.8        | 0.139 | 61  | 7/2002  | 9/2014  |
|                 | 7  | 314   | BCR     | 28.09 | 7  | 3   | 2ab | 4.1        | 0.110 | 52  | 6/2002  | 5/2005  |
|                 |    | 346   | non-BCR | 19.19 | 6  | 3   | 2ab | 4.5        | 0.112 | 55  | 7/2002  | 10/2014 |



|    |     |         |       |   |   |     |      |       |    |        |         |
|----|-----|---------|-------|---|---|-----|------|-------|----|--------|---------|
| 8  | 585 | BCR     | 7.80  | 7 | 3 | 2ab | 5.4  | 0.077 | 63 | 6/2003 | 3/2014  |
|    | 242 | non-BCR | 15.90 | 7 | 3 | 2ab | 8.9  | 0.150 | 60 | 4/2002 | 12/2009 |
| 9  | 618 | BCR     | 39.74 | 7 | 3 | 2ab | 4.0  | 0.123 | 62 | 7/2003 | 9/2011  |
|    | 619 | non-BCR | 38.19 | 6 | 3 | 2ab | 5.8  | 0.103 | 69 | 7/2003 | 5/2014  |
| 10 | 333 | BCR     | 47.29 | 7 | 3 | 2c  | 11.0 | 0.179 | 67 | 7/2002 | 1/2008  |
|    | 217 | non-BCR | 42.98 | 7 | 3 | 2c  | 1.7  | 0.065 | 56 | 3/2002 | 5/2010  |

**Table S5. The overall coefficients of Figure 4 in predicting BCR from non-BCR-matched groups for spectral regions** are calculated from coefficients for the principal component analysis of all spectral regions and coefficients for canonical analyses by using the four PCs (PC2, PC3, PC8, and PC10) producing the lowest p values (ranging from 0.08 to 0.29) according to the Student t-tests that were conducted on groups of the training cohort. (**Bold** numbers: major contributing factors defined as greater or smaller than Mean+StandardDeviation, or Mean-StandardDeviation, respectively.)

| Spectral Regions | Coefficient   |
|------------------|---------------|
| p414-410         | 0.144         |
| p405             | 0.067         |
| p399-396         | -0.017        |
| p394-393         | 0.120         |
| P378             | -0.078        |
| P375             | <b>-0.464</b> |
| P374-371         | <b>0.271</b>  |
| p363             | -0.005        |
| p362             | 0.074         |
| p36              | 0.017         |
| p334             | 0.037         |
| p329             | -0.042        |
| p327             | -0.029        |
| p326             | <b>0.170</b>  |
| p324             | <b>0.380</b>  |
| p322             | <b>-0.283</b> |
| p320             | <b>-0.400</b> |
| p315-310         | -0.120        |
| p309-305         | -0.165        |
| p303             | 0.039         |

|           |               |
|-----------|---------------|
| p271      | -0.034        |
| p268      | 0.090         |
| p255      | 0.009         |
| p252      | 0.138         |
| P245-p243 | 0.028         |
| P242-p240 | -0.007        |
| P236      | -0.105        |
| P235      | <b>-0.240</b> |
| P234      | -0.182        |
| P233-p230 | -0.080        |
| p147      | -0.159        |
| p133      | 0.134         |
| p128      | -0.042        |
| p120      | 0.092         |
| p096-p093 | -0.032        |
| p090      | -0.061        |
